# Supplementary material
Source: ML conference proceedings conference paper supplement (https://openreview.net/forum?id=bCeOHOuRhh)
Supplement: supplementary_material [file attachment]

---

# Singular Value Fine-tuning: Few-shot Segmentation requires Few-parameters Fine-tuning – Supplementary Material

---

Anonymous Author(s)

Affiliation

Address

email

## 1 Appendix

### 2 A More details

3 **Training Strategy:** Different from the training strategy of previous methods, we set the learning rate  
4 to 0.015 and use an SGD optimizer with cosine learning rate decay when fine-tuning the backbone.  
5 Therefore, we compared the impact of different training strategies on benchmark datasets. As shown  
6 in Table 1, the new training strategy does not affect the performance of FSS models. Therefore,  
*different training strategies are NOT the key to the success of SVF.*

Table 1: Compare with different training strategy on Pascal-5<sup>i</sup> training set in terms of mIoU for 1-shot segmentation.

| Method      | Backbone | Training Strategy | 1-shot |        |        |        |       |
|-------------|----------|-------------------|--------|--------|--------|--------|-------|
|             |          |                   | Fold-0 | Fold-1 | Fold-2 | Fold-3 | Mean  |
| baseline    | ResNet50 | original          | 65.60  | 70.28  | 64.12  | 60.27  | 65.07 |
| baseline    |          | ours              | 64.95  | 69.75  | 65.91  | 59.59  | 65.05 |
| PFENet [10] |          | original          | 66.61  | 72.55  | 65.33  | 60.91  | 66.35 |
| PFENet [10] |          | ours              | 65.58  | 72.49  | 66.12  | 60.30  | 66.12 |
| BAM [4]     |          | original          | 68.97  | 73.59  | 67.55  | 61.13  | 67.81 |
| BAM [4]     |          | ours              | 68.43  | 73.66  | 67.98  | 61.63  | 67.93 |

Table 2: Ablation study on the training trick.

| Method      | Backbone | Training Trick | 1-shot |        |        |        |       |
|-------------|----------|----------------|--------|--------|--------|--------|-------|
|             |          |                | Fold-0 | Fold-1 | Fold-2 | Fold-3 | Mean  |
| baseline    | ResNet50 | w/o            | 66.36  | 69.22  | 57.64  | 58.73  | 62.99 |
| baseline    |          | w              | 65.60  | 70.28  | 64.12  | 60.27  | 65.07 |
| PFENet [10] |          | w/o            | 67.06  | 71.61  | 55.21  | 59.46  | 63.34 |
| PFENet [10] |          | w              | 66.61  | 72.55  | 65.33  | 60.91  | 66.35 |
| CyCTR [16]  |          | w/o            | 67.80  | 72.80  | 58.00  | 58.00  | 64.20 |
| CyCTR [16]  |          | w              | 65.17  | 72.52  | 66.60  | 60.9   | 66.30 |
| BAM [4]     |          | w/o            | 68.37  | 72.05  | 57.55  | 60.38  | 64.59 |
| BAM [4]     |          | w              | 68.97  | 73.59  | 67.55  | 61.13  | 67.81 |

7  
8 **Training Tricks:** Following the same setting of BAM [4], we remove some images containing  
9 novel classes of the test set from the training set. This is a novel trick in FSS to further improve  
10 the performance. In Table 2, we compared the effect of this trick on FSS models. The results show  
11 that this trick brings 2.0 mIoU improvement over the original FSS model on average. Especially on  
12 Flod-2, the trend of improvement is very obvious. It proves that removing images with novel classes  
13 of the test set from the training set prevents potential information leakage.

Table 3: compare with parameter-efficient tuning methods on Pascal-5<sup>i</sup> 1-shot.

| Method   | fine-tune method | Fold-0 | Fold-1 | Fold-2 | Fold-3 | Mean  |
|----------|------------------|--------|--------|--------|--------|-------|
| baseline | freeze backbone  | 65.60  | 70.28  | 64.12  | 60.27  | 65.07 |
|          | SVF              | 67.42  | 71.57  | 67.99  | 61.57  | 67.14 |
|          | Adapter          | 18.41  | 20.21  | 26.62  | 17.62  | 20.71 |
|          | bias tuning      | 61.62  | 70.10  | 64.80  | 55.19  | 62.93 |

Table 4: Compare with different test image on COCO-20<sup>i</sup> in terms of mIoU for 1-shot segmentation.

| Method         | backbone | test image | 1-shot |        |        |        |       |
|----------------|----------|------------|--------|--------|--------|--------|-------|
|                |          |            | Fold-0 | Fold-1 | Fold-2 | Fold-3 | Mean  |
| baseline       | ResNet50 | 1000       | 38.91  | 46.07  | 42.67  | 39.71  | 41.84 |
| baseline + SVF |          | 1000       | 44.22  | 46.38  | 42.65  | 41.65  | 43.72 |
| baseline       |          | 4000       | 37.19  | 45.30  | 42.90  | 38.49  | 40.97 |
| baseline + SVF |          | 4000       | 39.80  | 46.99  | 42.51  | 42.06  | 42.84 |
| baseline       |          | 5000       | 36.59  | 45.17  | 43.34  | 38.73  | 40.96 |
| baseline + SVF |          | 5000       | 39.49  | 46.95  | 42.09  | 41.15  | 42.42 |

**Test image of COCO-20<sup>i</sup>:** We found that the number of test sets used in previous work was different when testing on COCO. For example, BAM [4], HSNet [7] were tested with 1000 images, yet Yang [13] was tested with 4000 images, and CyCTR [16] was tested with 5000 images. This is very detrimental to the development of the community. In Table 4, we compare the different number of test images on COCO-20<sup>i</sup> to observe changes in model performance. The experimental results show that as the number of test images increases, the performance of the baseline shows a downward trend. Therefore, we call on researchers to use the same training samples for a fair comparison. Meanwhile, SVF brings positive results in different numbers of test sets. It again shows the effectiveness of SVF.

## B Compare with other methods.

### B.1 compare with other SOTA methods

To clear the doubts of dataset, we use the unprocessed training set to make a fair comparison with other SOTA methods, as show in Table5. It can be seen that baseline with SVF achieves best performance on both Pascal-5<sup>i</sup> 1-shot and 5-shot settings. The experimental results prove that the advantages of SVF will not disappear due to the introduction of the training trick. Meanwhile, the experimental results prove that finetuning backbone is not only feasible in FSS, but also brings positive results to FSS models.

### B.2 compare with parameter-efficient tuning methods

Nowadays, adapter and bias tuning are the classic methods of Transformer-based backbone fine-tuning, and they have become the classic methods in fine-tuning. Since the core of SVF is to fine-tune the backbone, we compare the performance of SVF, adapter and bias tuning on few-shot segmentation. For quick check, we conduct experiments on Pascal-5 with the 1-shot setting. The details for adapter and bias tuning are given below: 1) Adapter is proposed in transformer-based models. When applying it into CNN-based backbone (ResNet), we make simple adjustments. We follow Adapter [1] to build the adapter structures and add them after the stages in the ResNet. 2) Bias Tuning: In the ResNet backbone, the convolution layers do not contain bias term. The bias terms that can be used for tuning is the ones in BN layers. We fine-tune the bias terms in all BN layers in this method. The experimental results are given in the table 3. It shows that SVF outperform Adapter and Bias Tuning by large margins. Moreover, we find that the introduction of Adapter will directly lead to over-fitting, while Bias Tuning reduces performance of the baseline model.

Table 5: Compare with SOTA on Pascal-5<sup>i</sup> [9] in terms of mIoU for 1-shot and 5-shot segmentation.

| Method         | backbone | 1-shot |        |        |        |              | 5-shot |        |        |        |              |
|----------------|----------|--------|--------|--------|--------|--------------|--------|--------|--------|--------|--------------|
|                |          | Fold-0 | Fold-1 | Fold-2 | Fold-3 | Mean         | Fold-0 | Fold-1 | Fold-2 | Fold-3 | Mean         |
| PANet [11]     | ResNet50 | 44.00  | 57.50  | 50.80  | 44.00  | 49.10        | 55.30  | 67.20  | 61.30  | 53.20  | 59.30        |
| CANet [15]     |          | 52.50  | 65.90  | 51.30  | 51.90  | 55.40        | 55.50  | 67.80  | 51.90  | 53.20  | 57.10        |
| PGNet [14]     |          | 56.00  | 66.90  | 50.60  | 50.40  | 56.00        | 57.70  | 68.70  | 52.90  | 54.60  | 58.50        |
| RPMNet [12]    |          | 55.20  | 66.90  | 52.60  | 50.70  | 56.30        | 56.30  | 67.30  | 54.50  | 51.00  | 57.30        |
| PPNet [5]      |          | 47.80  | 58.80  | 53.80  | 45.60  | 51.50        | 58.40  | 67.80  | 64.90  | 56.70  | 62.00        |
| CWT [6]        |          | 56.30  | 62.00  | 59.90  | 47.20  | 56.40        | 61.30  | 68.50  | 68.50  | 56.60  | 63.70        |
| PFENet [10]    |          | 61.70  | 69.50  | 55.40  | 56.30  | 60.80        | 63.10  | 70.70  | 55.80  | 57.90  | 61.90        |
| CyCTR [16]     |          | 67.80  | 72.80  | 58.00  | 58.00  | 64.20        | 71.10  | 73.20  | 60.50  | 57.50  | 65.60        |
| baseline       |          | 66.36  | 69.22  | 57.64  | 58.73  | 62.99        | 70.75  | 72.92  | 58.86  | 65.56  | 67.02        |
| baseline + SVF |          | 66.88  | 70.84  | 62.33  | 60.63  | <b>65.17</b> | 71.49  | 74.04  | 59.38  | 67.43  | <b>68.09</b> |

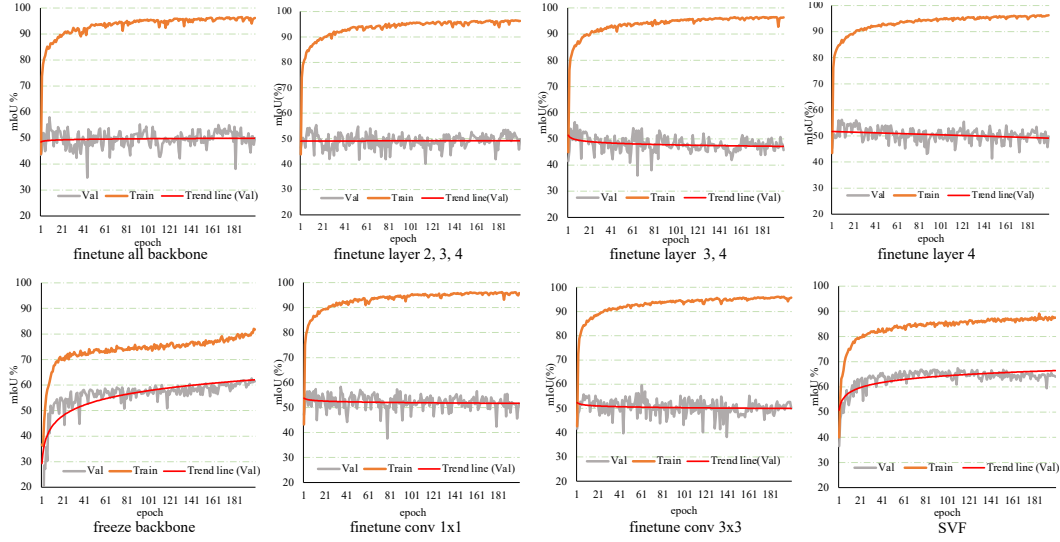

Figure 1: The mIoU curve of baseline with different finetune strategies on Pascal-5<sup>i</sup> Fold-0.

## 43 C Detailed Ablation Study

44 **Different finetune strategy:** In Figure 1, we visualize the mIoU curve of different fine-tuning  
45 strategies. It can be seen that both layer-based and convolution-based fine-tuning methods bring  
46 over-fitting problems. This result shows that traditional fine-tuning methods are not suitable for  
47 few-shot segmentation tasks. Directly fine-tuning the parameters of backbone in few-shot learning  
48 affects the robustness of FSS models. Therefore, we propose a novel fine-tuning strategy, namely  
49 SVF. It decompose pre-trained parameters into three successive matrices via the Singular Value  
50 Decomposition (SVD). Then, It only fine-tunes the singular value matrices during the training phase.  
51 The experimental results show that SVF can effectively avoid over-fitting while bringing positive  
52 results to FSS model.

53 **Singular value subspace:** In Figure 2, we visualize the changes of initial Top-30 largest singular  
54 values of all  $3 \times 3$  convolutional in layer 3 after SVF. The experimental results show that the change of

Table 6: Ablation study of BN on Pascal-5<sup>i</sup> under 1-shot setting. ✓ represents fine-tuning this feature space. The best mean results are show in **bold**.

| Method   | BN | scale | Fold-0 | Fold-1 | Fold-2 | Fold-3 | Mean                 |
|----------|----|-------|--------|--------|--------|--------|----------------------|
| baseline |    |       | 65.60  | 70.28  | 64.12  | 60.27  | 65.07                |
|          | ✓  |       | 61.93  | 70.67  | 62.02  | 57.86  | 63.12 (-1.95)        |
|          | ✓  | ✓     | 63.46  | 70.66  | 64.93  | 57.75  | 64.20 (-0.87)        |
|          |    | ✓     | 67.42  | 71.57  | 67.99  | 61.57  | <b>67.14 (+2.07)</b> |

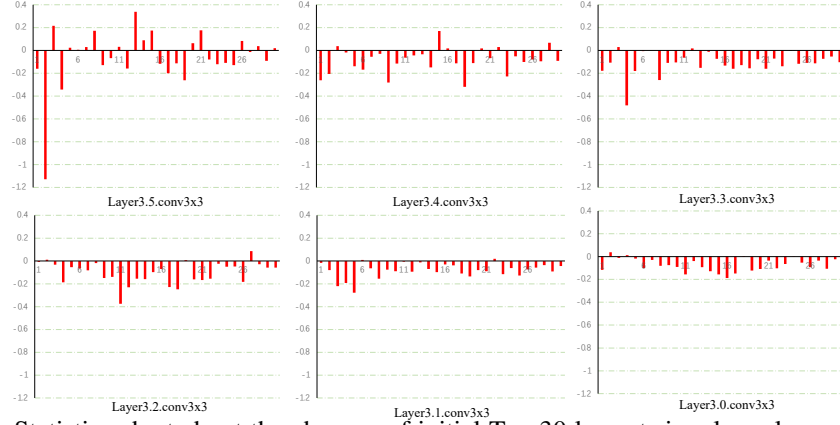

Figure 2: Statistics chart about the changes of initial Top-30 largest singular values of the  $3 \times 3$  convolutional in layer3 after SVF.

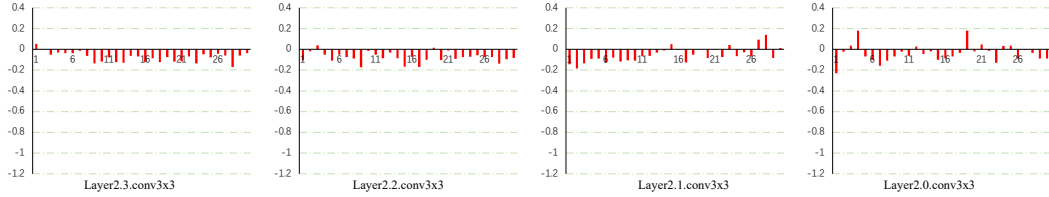

Figure 3: Statistics chart about the changes of initial Top-30 largest singular values of the  $3 \times 3$  convolutional in layer2 after SVF.

last 3x3 convolution is the most obvious, and the change of singular value gradually moderates as the network becomes shallower. To verify the above point, we visualize the singular value change map of all 3x3 convolutions of layer 2 in Figure 3. The variation of singular values in layer2 is more gradual. Furthermore we visualize the singular value changes from the  $1 \times 1$  convolution of layer 3 and layer 2 in Figure 4 and Figure 5. where the  $1 \times 1$  convolution is the last  $1 \times 1$  convolution of each block in ResNet. This result is the same trend as  $3 \times 3$  convolution. It shown that the information concerned by deep convolutions in pre-train backbone is not conducive to few-shot segmentation tasks. SVF improves the expressiveness of FSS model by focusing on adjusting distribution of singular value subspace in the deep convolution. Meanwhile, It proves that semantic cues in deep convolutions have the greatest impact on few-shot segmentation. In addition, Figure 6 shows the variation of all singular values. It can be easy seen that the change of singular values afterward tends to 0. Therefore, the change of top-30 singular values can describe the change of all singular values.

In Table 6, Table 7, Table 8, Table 9 and Tble 10, we give more detail ablation study results. It contains the results for each flod in different ablation study.

Table 7: Comparative experiment with fine-tuning different layer of backbone on Pascal-5<sup>i</sup>.

| Method           | layer      | Fold-0       | Fold-1       | Fold-2       | Fold-3       | Mean                 |
|------------------|------------|--------------|--------------|--------------|--------------|----------------------|
| baseline         | -          | 65.60        | 70.28        | 64.12        | 60.27        | 65.07                |
| +fully fine-tune | 1, 2, 3, 4 | 57.97        | 70.51        | 61.33        | 53.80        | 60.90 (-4.17)        |
| + part fine-tune | 2, 3, 4    | 55.34        | 71.16        | 62.72        | 55.38        | 61.15 (-3.92)        |
|                  | 3, 4       | 56.85        | 71.44        | 61.72        | 54.32        | 61.08 (-3.99)        |
|                  | 4          | 56.19        | 70.63        | 59.98        | 55.50        | 60.58 (-4.49)        |
| +SVF             | 2, 3, 4    | <b>67.42</b> | <b>71.57</b> | <b>67.99</b> | <b>61.57</b> | <b>67.14 (+2.07)</b> |

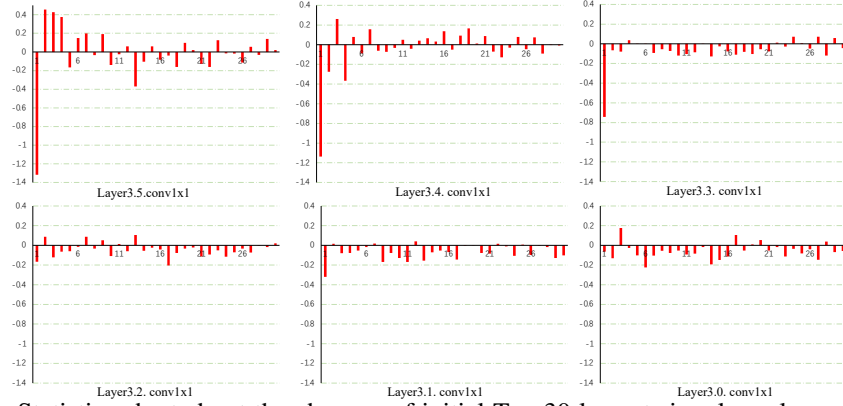

Figure 4: Statistics chart about the changes of initial Top-30 largest singular values of the  $1 \times 1$  convolutional in layer3 after SVF.

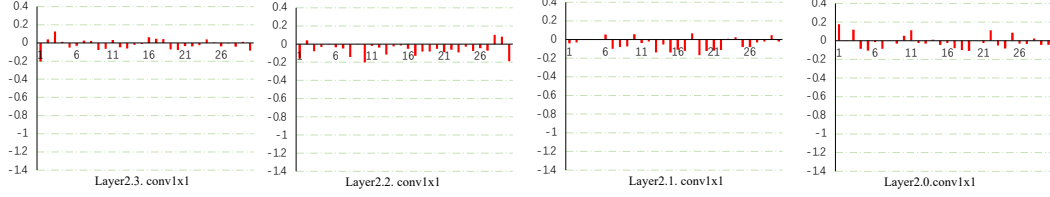

Figure 5: Statistics chart about the changes of initial Top-30 largest singular values of the  $1 \times 1$  convolutional in layer2 after SVF.

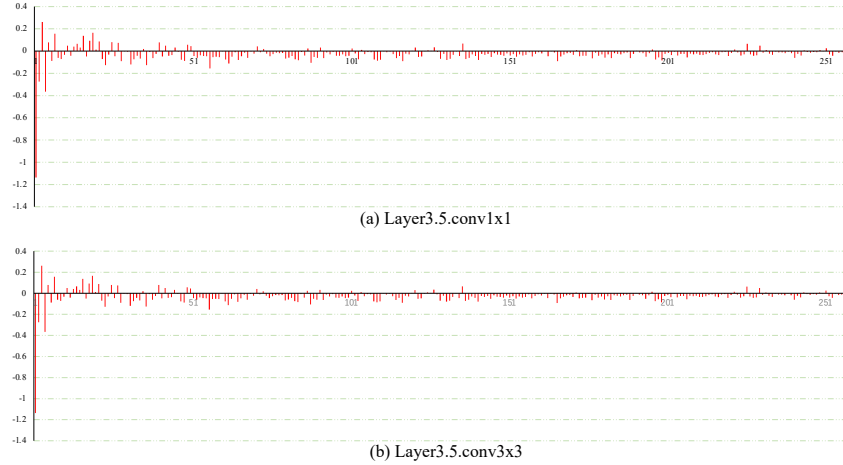

Figure 6: Statistics chart about the changes of all singular values of the last  $3 \times 3$  and  $1 \times 1$  convolutional in layer3 after SVF.

Table 8: Comparative experiment with fine-tuning different convolutional layer of backbone on Pascal-5<sup>i</sup>.

| Method          | layer   | $3 \times 3$ | $1 \times 1$ | Fold-0 | Fold-1 | Fold-2 | Fold-3 | Mean          |
|-----------------|---------|--------------|--------------|--------|--------|--------|--------|---------------|
| baseline        | -       | -            | -            | 65.60  | 70.28  | 64.12  | 60.27  | 65.07         |
| +part fine-tune | 2, 3, 4 | ✓            | ✓            | 55.34  | 71.16  | 62.72  | 55.38  | 61.15 (-3.92) |
|                 | 2, 3, 4 | ✓            | -            | 59.57  | 69.96  | 61.74  | 56.16  | 61.86 (-3.21) |
|                 | 2, 3, 4 | -            | ✓            | 58.30  | 70.50  | 62.04  | 55.63  | 61.62 (-3.45) |
| +SVF            | 2, 3, 4 | -            | -            | 67.42  | 71.57  | 67.99  | 61.57  | 67.14 (+2.07) |

Table 9: Ablation study of SVF fine-tuning different subspace on Pascal-5<sup>i</sup>.

| Method   | U | S | V | Fold-0 | Fold-1 | Fold-2 | Fold-3 | Mean  |
|----------|---|---|---|--------|--------|--------|--------|-------|
| baseline | ✓ |   |   | 58.14  | 70.06  | 60.91  | 55.24  | 61.09 |
|          |   | ✓ |   | 67.42  | 71.57  | 67.99  | 61.57  | 67.14 |
|          |   |   | ✓ | 53.87  | 70.63  | 63.65  | 55.36  | 60.88 |
|          | ✓ | ✓ |   | 57.54  | 70.19  | 62.12  | 56.41  | 61.57 |
|          |   | ✓ | ✓ | 53.30  | 71.21  | 62.24  | 54.92  | 60.42 |
|          | ✓ |   | ✓ | 53.81  | 70.75  | 61.92  | 53.60  | 60.02 |
|          | ✓ | ✓ | ✓ | 56.64  | 70.47  | 63.48  | 54.36  | 61.24 |
|          |   |   |   |        |        |        |        |       |

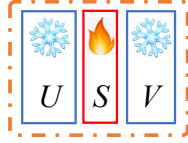

$$W = USV$$

(a)

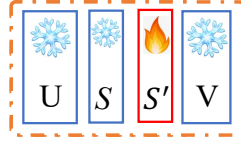

$$W = U(SS')V$$

(b)

Figure 7: Different implementations of SVF.

## 69 D Discussion

### 70 D.1 Discussion on other SVD

71 In this section, we discuss the differences between other SVD-based methods [2, 8] and SVF. Both  
 72 SVB [2] and *Hanie* [8] constrain the distribution of the singular values  $s$  where SVB [2] forces the  
 73 singular value around 1 and *Hanie* [8] clamps the large singular values into a constant, hence serving  
 74 as a regularization term. We did not pose an extra constraint on  $s$ , instead, encouraged the fully  
 75 trainable singular values. As illustrated in SVB’s Figure 1, the singular values of well-trained weights  
 76 are widely spread around [0,2]. The strong regularization proposed in SVB [2] and *Hanie* [8] should  
 77 damage the performance of pre-trained networks. Therefore, they turn to training from scratch, which  
 78 is infeasible in the circumstance of few-shot segmentation. Our method coupled with pre-trained  
 79 parameters can further exploit the capacity of the backbone, leading to superior results.

### 80 D.2 Discussion on different implementation

81 In this section, we provide a discussion on our SVF. The main idea of SVF is learning to change  
 82 singular values in the backbone weights. It has different implementations. We show two possible  
 83 ways to achieve SVF in Figure 7: (i) treat the single value matrix  $S$  as trainable parameters directly;  
 84 (ii) freeze the original singular value matrix  $S$  and introduce another trainable singular value matrix  
 85  $S'$  (we use exponential function  $\exp$  to keep it positive and initialize it with zeros), where the final  
 86 singular value matrix is a product of  $S$  (frozen) and  $S'$  (trainable). In the second implementation,  
 87 SVF keeps the backbone frozen (as all its weights are frozen) while introducing a small part of  
 88 extra trainable parameters. It shares similarities with the recently proposed Visual Prompt Tuning  
 89 (VPT) [3]. The difference between VPT and SVF is that VPT introduces the trainable parameters  
 90 in the input space while SVF introduces them in the singular value space. Although SVF and VPT  
 91 freeze the original backbone, they can produce optimization on the feature maps of the backbone.

Table 10: Ablation study of SVF fine-tuning different layer on Pascal-5<sup>i</sup>.

| Method         | layer      | Fold-0 | Fold-1 | Fold-2 | Fold-3 | Mean  |
|----------------|------------|--------|--------|--------|--------|-------|
| baseline + SVF | 4          | 68.28  | 71.04  | 65.59  | 59.91  | 66.21 |
|                | 3, 4       | 67.21  | 71.88  | 68.12  | 61.57  | 67.20 |
|                | 2, 3, 4    | 67.42  | 71.57  | 67.99  | 61.57  | 67.14 |
|                | 1, 2, 3, 4 | 67.06  | 71.69  | 67.77  | 61.94  | 67.12 |

Table 11: Comparing with only fine-tuning BN on Pascal-5<sup>i</sup>.

| Method   | Backbone  | Fine-tuning Method            | Fold-0 | Fold-1 | Fold-2 | Fold-3 | Mean  |
|----------|-----------|-------------------------------|--------|--------|--------|--------|-------|
| baseline | ResNet-50 | Freeze Backbone               | 65.60  | 70.28  | 64.12  | 60.27  | 65.07 |
|          |           | Fine-tuning BN scale (weight) | 62.28  | 68.66  | 61.19  | 58.18  | 62.58 |
|          |           | Fine-tuning BN shift (bias)   | 61.62  | 70.10  | 64.80  | 55.19  | 62.93 |
|          |           | Fine-tuning BN (weight+bias)  | 61.93  | 70.67  | 62.02  | 57.86  | 63.12 |
|          |           | SVF                           | 67.42  | 71.57  | 67.99  | 61.57  | 67.14 |

Table 12: introduce a new small part of parameters S' to verify the importance of singular values on Pascal-5<sup>i</sup>.

| Method   | Backbone  | Expression of weight | Fine-tune param | Fold-0 | Fold-1 | Fold-2 | Fold-3 | Mean         |
|----------|-----------|----------------------|-----------------|--------|--------|--------|--------|--------------|
| baseline | ResNet-50 | W                    | -               | 65.60  | 70.28  | 64.12  | 60.27  | 65.07        |
|          |           | S'W                  | S'              | 60.96  | 71.99  | 62.54  | 58.58  | 63.52        |
|          |           | WS'                  | S'              | 62.82  | 71.69  | 62.84  | 61.13  | 64.62        |
|          |           | USV <sup>T</sup>     | S               | 67.42  | 71.57  | 67.99  | 61.57  | <b>67.14</b> |

92 This property enables SVF to perform better in few-shot segmentation (FSS) and is the essential  
93 difference from the properties in previous SSF methods with frozen backbone (they do not change  
94 the feature maps of the backbone).

### 95 D.3 Discussion on success of SVF

96 In this section, we discuss the truly responsible for the success of SVF from three question. First,  
97 Does fine-tune another small part of parameters in the backbone work? We conduct experiments  
98 on Pascal-5<sup>i</sup> with the 1-shot setting. We compare our SVF with methods that only fine-tune the  
99 parameters in the BN layers. The results in Table 11 show that only fine-tuning the parameters in BN  
100 layers does not bring over-fitting in few-shot segmentation methods, but they perform worse than  
101 the conventional paradigm (freezing backbone). While our SVF outperform other methods by large  
102 margins.

103 Second, Is it really necessary to fine-tune the singular values? What if we introduce a new small  
104 part of parameters S', which is not in the singular value space, and only fine-tune the S'? To answer  
105 this question, we conduction two experiments, where the weight becomes S'W or WS', and only  
106 fine-tune the introduced small part of parameters S'. The results in Table 12 are consistence with  
107 Table 11. Both of them can avoid over-fitting but show slightly worse performance than the freezing  
108 backbone baseline. The above experimental results suggest that fine-tuning a small part of parameters  
109 is a good way to avoid over-fitting when fine-tuning the backbone in few-shot segmentation. But it is  
110 non-trivial to find such a small part of parameters that can bring considerable improvements.

111 Third, What causes the differences between SVF and WS' or S'W? In this question, we try to  
112 provide our understanding of what causes the superior performances of SVF over WS' and S'W.  
113 We conjecture that this may be related to the context that S or S' can access when fine-tuning the  
114 parameters. Assume that W has the shape of  $[M, N]$ . S and S' are diagonal matrices. S has the shape  
115 of  $[\text{Rank}, \text{Rank}]$ , and S' has the shape of  $[M, M]$  or  $[N, N]$ . When optimizing the parameters, S'  
116 only has relations on dimension M or dimension N in a channel-wise manner, while S can connect all  
117 channels on both dimension M and dimension N, as S is in the singular value space. This differences  
118 can affect the received gradients when training S or S', which results in different performance. To  
119 give more evidences, we design more variants of SVF and provide their results in Table 13.

Table 13: Compare with different implementations of SVF on Pascal-5<sup>i</sup> 1-shot.

| Method   | Backbone  | Expression of weight | Fine-tune param | Fold-0 | Fold-1 | Fold-2 | Fold-3 | Mean         |
|----------|-----------|----------------------|-----------------|--------|--------|--------|--------|--------------|
| baseline | ResNet-50 | W                    | -               | 65.60  | 70.28  | 64.12  | 60.27  | 65.07        |
|          |           | USV <sup>T</sup>     | S               | 67.42  | 71.57  | 67.99  | 61.57  | <b>67.14</b> |
|          |           | USS'V <sup>T</sup>   | S'              | 67.16  | 71.58  | 68.59  | 61.08  | 67.10        |
|          |           | USS'V <sup>T</sup>   | S + S'          | 66.42  | 71.73  | 67.23  | 61.12  | 66.63        |
|          |           |                      |                 |        |        |        |        |              |

Table 14: Compare with other SVD-based methods on Pascal-5<sup>i</sup> 1-shot.

| Method   | Backbone  | Expression of weight | Fine-tune param | Fold-0 | Fold-1 | Fold-2 | Fold-3 | Mean         |
|----------|-----------|----------------------|-----------------|--------|--------|--------|--------|--------------|
| baseline | ResNet-50 | $W$                  | -               | 65.60  | 70.28  | 64.12  | 60.27  | 65.07        |
|          |           | $USV^T$              | $S$             | 67.42  | 71.57  | 67.99  | 61.57  | <b>67.14</b> |
|          |           | $S'W$                | $S'$            | 60.96  | 71.99  | 62.54  | 58.58  | 63.52        |
|          |           | $RS'R'W$             | $S'$            | 32.91  | 51.93  | 51.00  | 37.60  | 43.36        |

Finally, To verify whether SVF depends crucially on the singular value space, or simply on the number of effective updated parameters. we design a experiment: let  $R$  be a random rotation matrix, and set  $U=R'$  and  $V=RW$ , where  $W$  is the original weight matrix for the given layer. The formulation of the weight becomes  $RS'R'W$ . Note that  $S'$  is initialized with an identity matrix as done in previous experiments. During the fine-tuning, we only train  $S'$  while keep others frozen in the backbone. We provide the results in Table 14. Random rotation formulation gives poor results. In fact, if we set  $R$  as an identity matrix (identity matrix is a rotation matrix),  $RS'R'W = S'W$ . As shown in the table,  $S'W$  is much better than random  $RS'R'W$ . It seems that the selection of the rotation matrix  $R$  is critical to the final segmentation performance. Meanwhile, If we consider  $RS'R'$  (it is a diagonal matrix in the initialization stage) as a whole,  $RS'R'$  is only related to one dimension of the weight  $W$ . Thus for the middle matrix  $S'$ , it is also channel-aligned with respect to weight  $W$ .

In addition, if  $R$  is random initialized, we can not guarantee that  $RS'R'$  is a diagonal matrix when updating  $S'$  during training (we verify this phenomenon with the saved checkpoints when we finish the training). Note that the weight  $W$  is the one from the pre-trained backbone, which contains semantic clues or learned knowledge. The non-diagonal matrix  $RS'R'$  may bring unexpected transformation to the pre-trained weight  $W$ , leading to poor results.

## E Code in PyTorch

In this section, we give the core code of SVF.

```
138 import copy
139 import inspect
140
141 import torch
142 import torch.nn as nn
143
144
145 def d_nsvd(matrix, rank=1):
146     U, S, V = torch.svd(matrix)
147     S = S[:rank]
148     U = U[:, :rank] # * S.view(1, -1)
149     V = V[:, :rank] # * S.view(1, -1)
150     V = torch.transpose(V, 0, 1)
151     return U, S, V
152
153
154 class SVD_Conv2d(nn.Module):
155
156     def __init__(self, in_channels, out_channels, kernel_size,
157                 stride, padding, dilation, groups, bias,
158                 padding_mode='zeros', device=None, dtype=None,
159                 rank=1):
160         super(SVD_Conv2d, self).__init__()
161         factory_kwargs = {'device': device, 'dtype': dtype}
162         self.conv_V = nn.Conv2d(
163             in_channels, rank, kernel_size, stride, padding, dilation, groups, False)
164         self.S = nn.Parameter(torch.empty((1, rank, 1, 1), **factory_kwargs))
165         self.conv_U = nn.Conv2d(
166             rank, out_channels, (1, 1), (1, 1), 0, (1, 1), 1, bias)
167
168     def forward(self, x):
169         x = self.conv_V(x)
170         x = x.mul(self.S)
171         output = self.conv_U(x)
172         return output
173
174
175 class SVD_Linear(nn.Module):
176
177     def __init__(self, in_features, out_features, bias, device=None, dtype=None, rank=1):
178         super(SVD_Linear, self).__init__()
179         factory_kwargs = {'device': device, 'dtype': dtype}
180         self.fc_V = nn.Linear(in_features, rank, False)
181         self.S = nn.Parameter(torch.empty((1, rank), **factory_kwargs))
182         self.fc_U = nn.Linear(rank, out_features, bias)
183
184     def forward(self, x):
185         x = self.fc_V(x)
186         x = x.mul(self.S)
187         output = self.fc_U(x)
188         return output
189
190
191 full2low_mapping_n = {
192     nn.Conv2d: SVD_Conv2d,
193     nn.Linear: SVD_Linear
194 }
195
196
197 def replace_fullrank_with_lowrank(model, full2low_mapping={}, layer_rank={}, lowrank_param_dict={},
198                                 module_name=""):
199     """Recursively replace original full-rank ops with low-rank ops.
200     """
201     if len(full2low_mapping) == 0 or full2low_mapping is None:
202         return model
203     else:
204         for sub_module_name in model._modules:
205             current_module_name = sub_module_name if module_name == "" else \
206                 module_name + "." + sub_module_name
207             # has children
208             if len(model._modules[sub_module_name]._modules) > 0:
209                 replace_fullrank_with_lowrank(model._modules[sub_module_name],
210                                             full2low_mapping,
211                                             layer_rank,
212                                             lowrank_param_dict,
213                                             current_module_name)
214             else:
215                 if type(getattr(model, sub_module_name)) in full2low_mapping and \
216                     current_module_name in layer_rank.keys():
217                     _attr_dict = getattr(model, sub_module_name).__dict__
218                     # use inspect.signature to know args and kwargs of __init__
219                     _sig = inspect.signature(
```

```

220         type(getattr(model, sub_module_name)))
221     _kwargs = {}
222     for param in _sig.parameters.values():
223         if param.name not in _attr_dict.keys():
224             if 'bias' in param.name:
225                 if getattr(model, sub_module_name).bias is not None:
226                     value = True
227             else:
228                 value = False
229             elif 'stride' in param.name:
230                 value = 1
231             elif 'padding' in param.name:
232                 value = 0
233             elif 'dilation' in param.name:
234                 value = 1
235             elif 'groups' in param.name:
236                 value = 1
237             elif 'padding_mode' in param.name:
238                 value = 'zeros'
239             else:
240                 value = None
241             _kwargs[param.name] = value
242         else:
243             _kwargs[param.name] = _attr_dict[param.name]
244     _kwargs['rank'] = layer_rank[current_module_name]
245     _layer_new = full2low_mapping[type(
246         getattr(model, sub_module_name))](**_kwargs)
247     old_module = getattr(model, sub_module_name)
248     old_type = type(old_module)
249     bias_tensor = None
250     if _kwargs['bias'] == True:
251         bias_tensor = old_module.bias.data
252     setattr(model, sub_module_name, _layer_new)
253     new_module = model._modules[sub_module_name]
254     if old_type == nn.Conv2d:
255         conv1 = new_module._modules["conv_U"]
256         conv2 = new_module._modules["conv_V"]
257         param_list = lowrank_param_dict[current_module_name]
258         conv1.weight.data.copy_(param_list[1])
259         conv2.weight.data.copy_(param_list[0])
260         new_module.scale.data.copy_(param_list[2])
261         if bias_tensor is not None:
262             conv2.bias.data.copy_(bias_tensor)
263     return model
264
265
266 class DatafreeSVD(object):
267
268     def __init__(self, model, global_rank_ratio=1.0,
269                 excluded_layers=[], customized_layer_rank_ratio={}, skip_1x1=True, skip_3x3=True):
270         # class-independent initialization
271         super(DatafreeSVD, self).__init__()
272         self.model = model
273         self.layer_rank = {}
274         model_dict_key = list(model.state_dict().keys())[0]
275         model_data_parallel = True if str(
276             model_dict_key).startswith('module') else False
277         self.model_cpu = self.model.module.to(
278             "cpu") if model_data_parallel else self.model.to("cpu")
279         self.model_named_modules = self.model_cpu.named_modules()
280         self.global_rank_ratio = global_rank_ratio
281         self.excluded_layers = excluded_layers
282         self.customized_layer_rank_ratio = customized_layer_rank_ratio
283         self.skip_1x1 = skip_1x1
284         self.skip_3x3 = skip_3x3
285
286         self.low_rank_tol = 0.05
287         self.param_lowrank_decomp_dict = {}
288         registered_param_op = [nn.Conv2d, nn.Linear]
289
290         for m_name, m in self.model_named_modules:
291             if type(m) in registered_param_op and m_name not in self.excluded_layers:
292                 weights_tensor = m.weight.data
293                 tensor_shape = weights_tensor.squeeze().shape
294                 param_1x1 = False
295                 param_3x3 = False
296                 depthwise_conv = False
297                 if len(tensor_shape) == 2:
298                     full_rank = min(tensor_shape[0], tensor_shape[1])
299                     param_1x1 = True
300                 elif len(tensor_shape) == 4:
301                     full_rank = min(
302                         tensor_shape[0], tensor_shape[1] * tensor_shape[2] * tensor_shape[3])
303                     if tensor_shape[2] == 1 and tensor_shape[3] == 1:
304                         param_1x1 = True
305                 else:

```

```

306         param_3x3 = True
307     else:
308         full_rank = 1
309         depthwise_conv = True
310
311     if self.skip_1x1 and param_1x1:
312         continue
313     if self.skip_3x3 and param_3x3:
314         continue
315     if depthwise_conv:
316         continue
317
318     self.layer_rank[m_name] = full_rank
319
320 def decompose_layers(self):
321     self.model_named_modules = self.model_cpu.named_modules()
322     for m_name, m in self.model_named_modules:
323         if m_name in self.layer_rank.keys():
324             weights_tensor = m.weight.data
325             tensor_shape = weights_tensor.shape
326             if len(tensor_shape) == 1:
327                 self.layer_rank[m_name] = 1
328                 continue
329             elif len(tensor_shape) == 2:
330                 weights_matrix = m.weight.data
331                 U, S, V = d_nsvd(weights_matrix, self.layer_rank[m_name])
332                 self.param_lowrank_decomp_dict[m_name] = [
333                     U, V, S.reshape(1, self.layer_rank[m_name])]
334             elif len(tensor_shape) == 4:
335                 weights_matrix = m.weight.data.reshape(tensor_shape[0], -1)
336                 U, S, V = d_nsvd(weights_matrix, self.layer_rank[m_name])
337                 self.param_lowrank_decomp_dict[m_name] = [
338                     V.reshape(
339                         self.layer_rank[m_name], tensor_shape[1], tensor_shape[2], tensor_shape[3]),
340                     S.reshape(1, self.layer_rank[m_name], 1, 1),
341                     U.reshape(tensor_shape[0],
342                             self.layer_rank[m_name], 1, 1)
343                 ]
344
345 def reconstruct_lowrank_network(self):
346     self.low_rank_model_cpu = copy.deepcopy(self.model_cpu)
347     self.low_rank_model_cpu = replace_fullrank_with_lowrank(
348         self.low_rank_model_cpu,
349         full2low_mapping=full2low_mapping_n,
350         layer_rank=self.layer_rank,
351         lowrank_param_dict=self.param_lowrank_decomp_dict,
352         module_name=""
353     )
354     return self.low_rank_model_cpu
355
356
357 def resolver(
358     model,
359     global_low_rank_ratio=1.0,
360     excluded_layers=[],
361     customized_layers_low_rank_ratio={},
362     skip_1x1=False,
363     skip_3x3=False,
364     tol=0.05
365 ):
366     lowrank_resolver = DatafreeSVD(model,
367                                   global_rank_ratio=global_low_rank_ratio,
368                                   excluded_layers=excluded_layers,
369                                   customized_layer_rank_ratio=customized_layers_low_rank_ratio,
370                                   skip_1x1=skip_1x1,
371                                   skip_3x3=skip_3x3)
372     lowrank_resolver.decompose_layers()
373     lowrank_cpu_model = lowrank_resolver.reconstruct_lowrank_network()
374     return lowrank_cpu_model
375
376
377 if __name__ == "__main__":
378     origin_model = FSS_model
379     final_model = resolver(origin_model)

```

## 380 References

- 381 [1] Neil Houlsby, Andrei Giurgiu, Stanislaw Jastrzebski, Bruna Morrone, Quentin De Laroussilhe, Andrea Ges-  
382 mundo, Mona Attariyan, and Sylvain Gelly. Parameter-efficient transfer learning for nlp. In *International*  
383 *Conference on Machine Learning*, pages 2790–2799. PMLR, 2019.

- 384 [2] Kui Jia, Dacheng Tao, Shenghua Gao, and Xiangmin Xu. Improving training of deep neural networks  
385 via singular value bounding. In *Proceedings of the IEEE Conference on Computer Vision and Pattern  
386 Recognition*, pages 4344–4352, 2017.
- 387 [3] Menglin Jia, Luming Tang, Bor-Chun Chen, Claire Cardie, Serge Belongie, Bharath Hariharan, and  
388 Ser-Nam Lim. Visual prompt tuning. *arXiv preprint arXiv:2203.12119*, 2022.
- 389 [4] Chunbo Lang, Gong Cheng, Binfei Tu, and Junwei Han. Learning what not to segment: A new perspective  
390 on few-shot segmentation. *arXiv preprint arXiv:2203.07615*, 2022.
- 391 [5] Yongfei Liu, Xiangyi Zhang, Songyang Zhang, and Xuming He. Part-aware prototype network for few-shot  
392 semantic segmentation. In *European Conference on Computer Vision*, pages 142–158. Springer, 2020.
- 393 [6] Zhihe Lu, Sen He, Xiatian Zhu, Li Zhang, Yi-Zhe Song, and Tao Xiang. Simpler is better: Few-shot  
394 semantic segmentation with classifier weight transformer. In *Proceedings of the IEEE International  
395 Conference on Computer Vision*, pages 8741–8750, 2021.
- 396 [7] Juhong Min, Dahyun Kang, and Minsu Cho. Hypercorrelation squeeze for few-shot segmentation. In  
397 *Proceedings of the IEEE International Conference on Computer Vision*, pages 6941–6952, 2021.
- 398 [8] Hanie Sedghi, Vineet Gupta, and Philip M Long. The singular values of convolutional layers. In  
399 *International Conference on Learning Representations*, 2018.
- 400 [9] Amirreza Shaban, Shray Bansal, Zhen Liu, Irfan Essa, and Byron Boots. One-shot learning for semantic  
401 segmentation. *arXiv preprint arXiv:1709.03410*, 2017.
- 402 [10] Zhuotao Tian, Hengshuang Zhao, Michelle Shu, Zhicheng Yang, Ruiyu Li, and Jiaya Jia. Prior guided  
403 feature enrichment network for few-shot segmentation. *IEEE Transactions on Pattern Analysis and  
404 Machine Intelligence*, 2020.
- 405 [11] Kaixin Wang, Jun Hao Liew, Yingtian Zou, Daquan Zhou, and Jiashi Feng. Panet: Few-shot image  
406 semantic segmentation with prototype alignment. In *Proceedings of the IEEE International Conference on  
407 Computer Vision*, pages 9197–9206, 2019.
- 408 [12] Boyu Yang, Chang Liu, Bohao Li, Jianbin Jiao, and Qixiang Ye. Prototype mixture models for few-shot  
409 semantic segmentation. In *European Conference on Computer Vision*, pages 763–778. Springer, 2020.
- 410 [13] Lihe Yang, Wei Zhuo, Lei Qi, Yinghuan Shi, and Yang Gao. Mining latent classes for few-shot segmentation.  
411 In *Proceedings of the IEEE International Conference on Computer Vision*, pages 8721–8730, 2021.
- 412 [14] Chi Zhang, Guosheng Lin, Fayao Liu, Jiushuang Guo, Qingyao Wu, and Rui Yao. Pyramid graph networks  
413 with connection attentions for region-based one-shot semantic segmentation. In *Proceedings of the IEEE  
414 International Conference on Computer Vision*, pages 9587–9595, 2019.
- 415 [15] Chi Zhang, Guosheng Lin, Fayao Liu, Rui Yao, and Chunhua Shen. Canet: Class-agnostic segmentation  
416 networks with iterative refinement and attentive few-shot learning. In *Proceedings of the IEEE Conference  
417 on Computer Vision and Pattern Recognition*, pages 5217–5226, 2019.
- 418 [16] Gengwei Zhang, Guoliang Kang, Yi Yang, and Yunchao Wei. Few-shot segmentation via cycle-consistent  
419 transformer. *Advances in Neural Information Processing Systems*, 34, 2021.
